# Supplementary material
Source: PubMed Central journal article supplement (PMC1366628)
Supplement: biophysj_105.058917_2.pdf [file biophysj_105.058917_2.pdf]

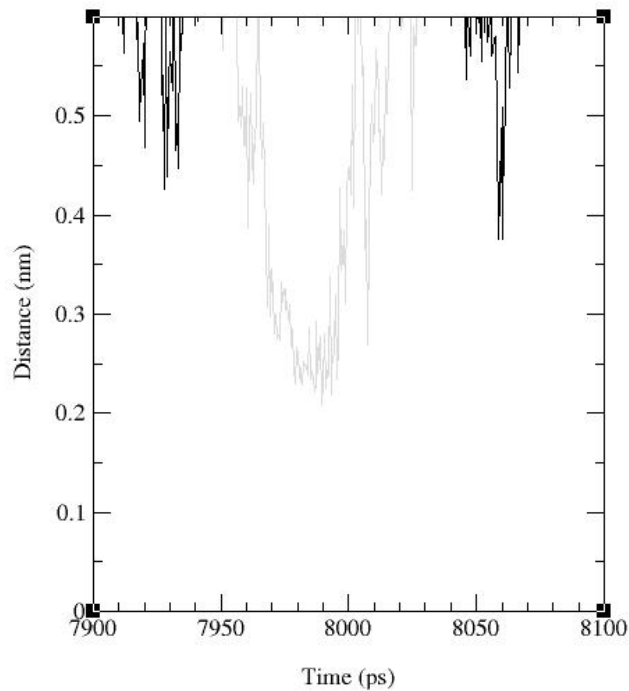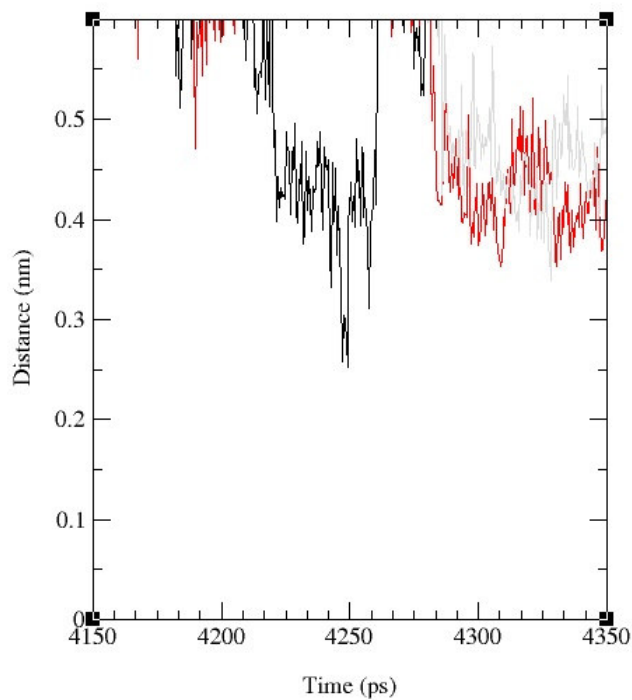

SUPPLEMENTARY FIGURE 1 A. The distance between one of the chloride ions and the hydrogen atoms attached to the guanido group of arg28 (black) or the amino group of arg36 (grey), as a function of the simulation time during the simulation MD\_E22p. The ion rapidly moves from the vicinity of arg28 to the vicinity of arg36

and back. **B.** The distance between one of the sodium ions and the carboxylate oxygens of glu31 (black), glu38 (red) and glu66 (grey), during the simulation MD\_S. The ion is detained by one or two of the negative residues during the presented time frame.

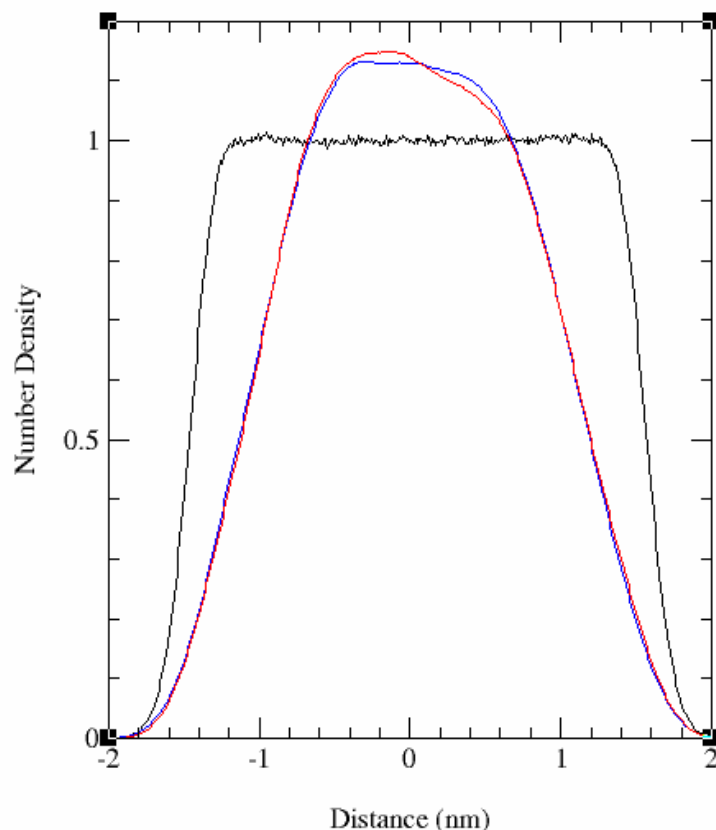

SUPPLEMENTARY FIGURE 2 Number densities of ions ( $\text{Cl}^-$  in red,  $\text{Na}^+$  in blue) and water oxygen atoms (black) plotted versus distance from the center of the solution slab in the direction normal to the water-air interface as calculated over a 10ns simulation of 1.2M salt solution at the water-air interface. The ions are located near the center of the slab, in contrast to the results of Jungwirth and Tobias (Jungwirth and Tobias 2001; Jungwirth and Tobias 2002), in which the  $\text{Cl}^-$  ions were closer to the interface (see the Discussion in the main text). The number densities are normalized by a division of the values by bulk number densities. Values for  $\text{Na}^+$  and  $\text{Cl}^-$  are averaged over slices of 100ps.

## References

Jungwirth P, Tobias DJ. 2001. Molecular structure of salt solutions: A new view of the interface with implications for heterogeneous atmospheric chemistry. *J. Phys. Chem. B.* 105:10468-10472.

Jungwirth P, Tobias DJ. 2002. Ions at the air/water interface. *J. Phys. Chem. B* 106:6361-6373.
